# Supplementary material for: Quantifying the Acoustic Startle Response in Mice Using Standard Digital Video
Source: Front Behav Neurosci. 2020 Jun 3;14:83. doi: 10.3389/fnbeh.2020.00083 (PMC7289120; doi:10.3389/fnbeh.2020.00083)
Supplement: Supplementary Data 1 — Data sheet corresponding to Figure 1 (Input/output function) in the article. [file Data_Sheet_1.xlsx]

## Sheet: Sheet1
Subject	75 dB	80 dB	85 dB	90 dB	95 dB	100 dB	105 dB	110 dB	115 dB	120 dB
1	48	151	71	286	161	478	141	141	236	139
2	79.25	77	-118	125	321	338	622	85	379	472
3	-132	70	186	-11	70	66	132	24	70	157
4	26	38	-208	-1	101	326	352	333	378	427
5	90	52	73	88	66	12	8	169	149	27
6	34	63	87	37	156	235	246	209	174	143
7	86.25	42	85	54	163	148	147	141	99	239
8	151.5	64	147	17	152	-17	180	595	125	50
9	13	42	24	35	67	136	137	207	157	131
10	68.25	386	-35	18	173	335	104	159	88	166
11	62.25	50	58	19	45	74	98	134	77	135
12	42	0	-62	194	-24	160	30	2	259	110
13	87	-31	179	37	102	26	69	121	271	70
14	61.5	40	30	-94	5	31	40	57	51	28
15	65.75	47	70	104	129	67	392	232	165	141
16	29.25	5	93	37	109	372	449	851	402	238
