# Supplementary material for: Quantifying the Acoustic Startle Response in Mice Using Standard Digital Video
Source: Front Behav Neurosci. 2020 Jun 3;14:83. doi: 10.3389/fnbeh.2020.00083 (PMC7289120; doi:10.3389/fnbeh.2020.00083)
Supplement: Supplementary Data 2 — Data sheet corresponding to Figure 4 (Prepulse inhibition) in the article. [file Data_Sheet_2.xlsx]

## Sheet: Sheet1
Subject	Pulse only	Pulse + 75dB prepulse (50ms ISI)	Pulse + 85dB prepulse (50ms ISI)	Pulse + 75dB prepulse (100ms ISI)	Pulse + 85dB prepulse (100ms ISI)	75dB prepulse only	85dB prepulse only
1	-7	100	-52	170	96	37	113
1	139	68	187	34	273	27	146
1	200	75	23	135	29	-87	115
1	324	111	24	109	13	79	-8
1	228	71	188	78	-4	-32	-202
1	221	55	58	49	51	27	33
1	220	133	73	94	64	-21	168
1	217	93	77	124	166	21	117
1	180	-83	209	48	-54	27	2
1	169	52	229	234	130	-49	47
2	-251	369	127	151	133	-138	-141
2	259	-37	56	153	250	-94	-21
2	356	69	-148	114	139	77	-246
2	156	262	-107	244	111	153	114
2	-2	64	-19	136	25	-96	36
2	131	137	75	364	167	128	-127
2	-22	58	-11	231	-82	300	140
2	408	84	194	142	229	-210	56
2	280	156	55	722	165	-39	-51
2	196	48	23	272	-183	-8	-27
3	382	41	5	59	54	5	6
3	3	37	9	1	10	0	20
3	141	-69	21	51	11	13	5
3	22	-23	15	33	19	172	19
3	49	9	6	7	24	8	12
3	9	5	3	4	20	3	0
3	25	16	13	20	8	10	23
3	-281	-16	17	28	5	172	33
3	56	4	-50	100	52	17	5
3	-33	25	17	-8	-1	0	8
4	257	100	73	-109	40	-29	200
4	358	59	131	87	233	-62	163
4	94	-112	419	3	90	42	-87
4	206	381	47	291	164	40	-100
4	283	33	174	123	106	37	-234
4	354	-125	158	279	43	-21	56
4	15	65	39	70	148	87	19
4	6	53	215	31	130	26	73
4	185	19	-28	77	244	-53	2
4	116	80	50	185	142	-81	52
5	130	72	14	215	16	139	27
5	89	48	92	89	126	-18	50
5	97	45	267	-104	82	113	84
5	100	45	56	-71	11	36	32
5	47	18	19	9	34	-6	80
5	48	-88	0	49	22	42	76
5	27	30	70	90	82	189	161
5	71	-23	25	9	-16	76	9
5	45	60	30	38	20	25	95
5	-69	46	70	41	31	95	77
6	210	180	-99	79	-24	9	-30
6	493	133	9	39	21	1	-81
6	69	-30	55	41	76	127	90
6	459	-12	89	28	47	-28	102
6	162	73	55	107	12	39	55
6	665	44	-34	148	45	25	-46
6	113	180	73	138	206	-2	4
6	825	20	44	168	-28	50	-10
6	439	154	-22	131	85	151	-25
6	-154	93	53	21	96	-34	79
7	17	12	24	8	-67	49	25
7	39	24	46	78	27	8	7
7	33	12	29	13	28	9	27
7	31	52	15	16	-22	11	9
7	71	6	20	-12	9	27	16
7	11	60	36	35	-7	19	8
7	41	41	51	59	24	11	13
7	38	19	26	9	26	3	12
7	16	17	14	13	18	37	36
7	18	12	15	21	17	5	6
8	66	157	116	110	220	51	85
8	171	26	14	90	2	195	56
8	51	11	75	242	36	-3	413
8	140	22	-212	16	360	-64	20
8	33	187	23	10	46	-33	47
8	25	26	65	23	16	47	-68
8	74	98	42	76	9	77	70
8	233	24	121	14	87	135	105
8	94	47	15	16	16	16	-172
8	54	33	20	-102	47	113	116
9	3	160	164	24	497	114	80
9	151	95	71	38	99	19	30
9	52	149	77	-4	-53	21	48
9	19	45	44	76	26	17	29
9	53	64	41	41	77	113	28
9	12	42	114	107	135	50	73
9	-48	180	105	59	79	-65	73
9	132	86	104	214	114	130	51
9	78	44	95	153	119	21	29
9	147	147	121	107	111	64	6
10	-45	-16	31	99	153	12	-126
10	55	40	93	16	63	41	85
10	207	-23	120	60	-180	88	12
10	104	128	-2	-40	-31	41	-56
10	92	-42	23	207	182	99	30
10	137	-22	120	128	70	38	115
10	-13	133	-50	140	17	-86	192
10	195	-16	74	45	365	342	79
10	58	-14	375	-39	116	-12	-9
10	9	132	62	8	76	101	23
11	80	28	48	49	-8	104	170
11	305	107	35	321	113	7	55
11	89	73	16	25	32	16	72
11	40	20	44	31	36	48	135
11	49	18	75	233	15	19	-23
11	50	5	-96	-33	-17	27	45
11	79	27	134	-11	112	7	-208
11	164	144	140	117	21	-11	264
11	51	56	106	51	97	7	27
11	125	95	11	65	41	31	50
12	213	160	-265	246	37	43	118
12	53	148	441	49	-43	40	329
12	28	-126	0	-51	128	8	161
12	146	35	-59	9	301	682	180
12	-27	54	9	48	25	-6	12
12	-68	903	-3	192	13	-10	167
12	351	-208	39	99	257	324	100
12	69	-389	251	172	292	83	-1
12	82	41	12	100	13	-3	-104
12	30	114	390	-37	75	-385	-22
13	32	114	82	52	58	63	356
13	23	26	564	82	46	3	71
13	50	21	18	37	16	59	-96
13	19	143	39	64	21	74	99
13	20	30	39	11	17	127	3
13	61	32	35	32	71	3	77
13	87	48	16	28	-28	-28	9
13	112	143	28	16	27	-140	38
13	92	22	50	52	-154	83	22
13	61	50	138	87	51	124	16
14	178	34	24	43	47	42	33
14	114	24	83	-26	19	117	79
14	40	204	16	73	83	-19	-67
14	44	60	8	54	14	97	100
14	45	22	23	12	39	69	60
14	37	11	14	33	45	10	43
14	-25	5	30	114	49	28	15
14	74	121	140	46	114	21	19
14	62	118	8	89	-111	47	60
14	4	31	249	37	39	45	32
15	-6	41	236	143	106	28	250
15	319	-30	74	67	160	56	1
15	46	72	14	68	46	-24	25
15	60	30	35	48	11	46	71
15	96	18	150	165	7	71	70
15	94	13	4	20	49	89	4
15	23	71	82	36	32	13	-5
15	176	257	23	33	36	27	22
15	70	-7	23	29	112	18	2
15	58	18	6	8	120	4	-8
16	150	177	29	237	57	89	41
16	100	-102	44	66	16	139	15
16	87	-10	244	19	70	-39	20
16	164	1	1	59	0	36	28
16	187	0	6	5	0	31	15
16	193	29	1	-46	50	30	8
16	45	-102	56	16	65	31	5
16	81	13	22	22	6	93	19
16	64	32	-76	20	85	-86	28
16	17	22	47	122	169	-112	-9
